# Supplementary material for: Evolution of the Expansin Superfamily in Bryophytes and Green Algae
Source: Research Square preprint supplement (doi:10.21203/rs.3.rs-8810289/v1), 2026-02-20
Supplement: Supplementary file 1 [file 07ceb8e4d1b8664f76d13d93.xlsx]

## Sheet: Sheet1
Anthoceros Agrestis		Ceratodon purpureus		Chara Braunii		Conocephalum Conicum		Marchantia Polymorpha		Spirogloea muscicola
Name	Intron	Name	Intron	Name	Intron	Name	Intron	Name	Intron	Name	Intron
AaEXPA1	[AB]	CpEXPA1	[AB]	CbEXP1	[x]	CcEXPA1	A	MpEXPA1	[AB]	SpmEXP1	[ABF]
AaEXPA2	[AB]	CpEXPA2	[x]	CbEXP2	[H]	CcEXPA2	A	MpEXPA2	[AB]	SpmEXP2	[x]
AaEXPA3	[AB]	CpEXPA3	[x]	CbEXP3	[H]	CcEXPA3	AB	MpEXPA3	[AB]	SpmEXP3	[x]
AaEXPA4	[AB]	CpEXPA4	[AB]	CbEXP4	[H]	CcEXPA4	AB	MpEXPA4	[AB]	SpmEXP4	[CBF]
AaEXPA5	[AB]	CpEXPA5	[AB]	CbEXP5	[H]	CcEXPA5	B	MpEXPA5	[AB]	SpmEXP5	[x]
AaEXPA6	[AB]	CpEXPA6	[B]	CbEXP6	[H]	CcEXPA6	AB	MpEXPA6	[A]	SpmEXP6	[CBF]
AaEXPA7	[AB]	CpEXPA7	[B]	CbEXP7	[H]	CcEXPA7	AB	MpEXPA7	[AB]	SpmEXP7	[ABF]
AaEXPB1	[ACBF]	CpEXPA8	[x]	CbEXP8	[AB]	CcEXPA8	AB	MpEXPA8	[AB]	SpmEXP8	[x]
AaEXPB2	[ABF]	CpEXPA9	[AB]	CbEXP9	[H]	CcEXPA9	AB	MpEXPA9	[AB]	SpmEXP9	[x]
AaEXPB3	[ABF]	CpEXPA10	[AB]	CbEXP10	[H]	CcEXPA10	AB	MpEXPA10	[AB]	SpmEXP10	[ABF]
AaEXPB4	[ABF]	CpEXPA11	[AB]	CbEXP11	[x]	CcEXPA11	AB	MpEXPA11	[AB]	SpmEXP11	[CBF]
AaEXPB5	[ABF]	CpEXPA12	[A]	CbEXP12	[H]	CcEXPA12	AB	MpEXPA12	[AB]	SpmEXP12	[x]
AaEXPB6	[ABF]	CpEXPA13	[x]	CbEXP13	[H]	CcEXPA13	AB	MpEXPA13	[AB]
AaEXPB7	[AB]	CpEXPA14	[AB]	CbEXP14	[H]	CcEXPA14	AB	MpEXPA14	[AB]
AaEXPB8	[ACBF]	CpEXPA15	[AB]	CbEXP15	[x]	CcEXPA15	ABF	MpEXPA15	[AB]
		CpEXPA16	[AB]	CbEXP16	[H]	CcEXPA16	AB	MpEXPA16	[AB]
		CpEXPA17	[AB]	CbEXP17	[H]	CcEXPA17	AB	MpEXPA17	[AB]
		CpEXPA18	[B]	CbEXP18	[H]	CcEXPA18	AB	MpEXPA18	[A]
		CpEXPA19	[x]	CbEXP19	[n]	CcEXPA19	AB	MpEXPA19	[AB]
		CpEXPA20	[x]	CbEXP20	[B]	CcEXPA20	AB	MpEXPA20	[AB]
		CpEXPA21	[B]	CbEXP21	[AB]	CcEXPA21	A	MpEXPA21	[AB]
		CpEXPA22	[x]	CbEXP22	[x]	CcEXPA22	AB	MpEXPA22	[AB]
		CpEXPB1	[x]			CcEXPA23	AB	MpEXPA23	[A]
		CpEXPB2	[A]			CcEXPA24	AB	MpEXPA24	[A]
		CpEXPB3	[A]			CcEXPA25	AB	MpEXPA25	[AB]
		CpEXPB4	[x]			CcEXPA26	AB	MpEXPA26	[AB]
		CpEXPB5	[A]			CcEXPA27	AB	MpEXPA27	[B]
		CpEXPB6	[ACnFn]			CcEXPA28	AB	MpEXPA28	[B]
						CcEXPA29	AB	MpEXPA29	[AB]
						CcEXPA30	AB	MpEXPA30	[AB]
						CcEXPA31	AB	MpEXPA31	[AB]
						CcEXPA32	AB	MpEXPA32	[AB]
								MpEXPA33	[x]
								MpEXPA34	[x]
								MpEXPA35	[AB]
								MpEXPA36	[AB]
								MpEXPA37	[AB]
								MpEXPA38	[AB]
