# Supplementary material for: Evolution of the Expansin Superfamily in Bryophytes and Green Algae
Source: Research Square preprint supplement (doi:10.21203/rs.3.rs-8810289/v1), 2026-02-20
Supplement: Supplementary file 2 [file 23f51f16537f85294c0451cb.xlsx]

## Sheet: Sheet1
Anthoceros Agrestis		Ceratodon purpureus			Chara Braunii			Conocephalum Conicum			Marchantia Polymorpha		Spirogloea muscicola
Name	Accession	Name	Phytozome Ceratodon purpureus R40 v1.1	NCBI Location	Name	SeqID	Ranges	Name	SeqID	Range	Name	Accession Number	Name	Accession
AaEXPA1	AagrBONN_evm.model.Sc2ySwM_344.1070.1 . AagrBONN_evm.TU.Sc2ySwM_344.1070 Sc2ySwM_344:4779767-4780746(+)	CpEXPA1	C.purpureus_R40 v1.1|CepurR40.1G161400.1	CM026421.1:13030500-13032000	CbEXP1	BFEA01000021.1	4629200-4630100	CcEXPA1	CM114255.1	2217500-2219000	MpEXPA1	Mp1g14140.1	SpmEXP1	s_107:150403-151921
AaEXPA2	AagrBONN_evm.model.Sc2ySwM_344.1069.1 EVM AagrBONN_evm.TU.Sc2ySwM_344.1069 Sc2ySwM_344:4771603-4772665(-)	CpEXPA2	C.purpureus_R40 v1.1|CepurR40.1G177200.1	CM026421.1:14191500-14192700	CbEXP2	BFEA01000023.1	962700-964300	CcEXPA2	CM114255.1	2233000-2234700	MpEXPA2	Mp1g22700.1	SpmEXP2	s_171:79041-85456
AaEXPA3	AagrBONN_evm.model.Sc2ySwM_344.1065.1 . AagrBONN_evm.TU.Sc2ySwM_344.1065 Sc2ySwM_344:4761830-4762918(-)	CpEXPA3	C.purpureus_R40 v1.1|CepurR40.1G177300.1	CM026421.1:14195000-14196400	CbEXP3	BFEA01000023.2	988100-989600	CcEXPA3	CM114255.1	6136600-6139000	MpEXPA3	Mp1g22720.1	SpmEXP3	s_219:14908-16165
AaEXPA4	AagrBONN_evm.model.Sc2ySwM_344.1067.1 . AagrBONN_evm.TU.Sc2ySwM_344.1067 Sc2ySwM_344:4769151-4770262(+)	CpEXPA4	C.purpureus_R40 v1.1|CepurR40.1G265700.1	CM026421.1:21321700-21323200	CbEXP4	BFEA01000023.3	1010500-1012200	CcEXPA4	CM114255.1	8489000-8491400	MpEXPA4	Mp1g22730.1	SpmEXP4	s_3:100193-101777
AaEXPA5	AagrBONN_evm.model.Sc2ySwM_344.1064.1 EVM AagrBONN_evm.TU.Sc2ySwM_344.1064 Sc2ySwM_344:4755062-4757140(+)	CpEXPA5	C.purpureus_R40 v1.1|CepurR40.1G317300.1	CM026421.1:26205200-26207800	CbEXP5	BFEA01000023.4	1032900-1034400	CcEXPA5	CM114255.1	34624500-34627000	MpEXPA5	Mp1g22740.1	SpmEXP5	s_3:532954-534217
AaEXPA6	AagrBONN_evm.model.Sc2ySwM_117.1068.1 EVM AagrBONN_evm.TU.Sc2ySwM_117.1068 Sc2ySwM_117:4433144-4434428(+)	CpEXPA6	C.purpureus_R40 v1.1|CepurR40.3G119900.1	CM026423.1:10344500-10346200	CbEXP6	BFEA01000023.5	1518100-1539000	CcEXPA6	CM114255.1	34635500-34637700	MpEXPA6	Mp1g24230.1	SpmEXP6	s_3:535155-536687
AaEXPA7	AagrBONN_evm.model.Sc2ySwM_344.1053.1 . AagrBONN_evm.TU.Sc2ySwM_344.1053 Sc2ySwM_344:4700046-4701360(-)	CpEXPA7	C.purpureus_R40 v1.1|CepurR40.3G120000.1	CM026423.1:10348600-10349700	CbEXP7	BFEA01000105.1	519000-521900	CcEXPA7	CM114255.1	44347000-44349000	MpEXPA7	Mp1g24390.1	SpmEXP7	s_3:744002-745496
AaEXPB1	AagrBONN_evm.model.Sc2ySwM_369.166.4 . AagrBONN_evm.TU.Sc2ySwM_369.166 Sc2ySwM_369:747312-748560(+)	CpEXPA8	C.purpureus_R40 v1.1|CepurR40.3G019900.1	CM026423.1:2397000-2398200	CbEXP8	BFEA01000112.1	86000-86600	CcEXPA8	CM114260.1	4278700-4281000	MpEXPA8	Mp1g26350.1	SpmEXP8	s_3:98438-99271
AaEXPB2	AagrBONN_evm.model.Sc2ySwM_344.1931.1 EVM AagrBONN_evm.TU.Sc2ySwM_344.1931 Sc2ySwM_344:8429487-8430707(-)	CpEXPA9	C.purpureus_R40 v1.1|CepurR40.3G059300.1	CM026423.1:5605500-5607400	CbEXP9	BFEA01000128.1	1994600-1997900	CcEXPA9	CM114260.1	16134500-16136800	MpEXPA9	Mp1g26880.1	SpmEXP9	s_428:20190-21011
AaEXPB3	AagrBONN_evm.model.Sc2ySwM_344.1935.1 EVM AagrBONN_evm.TU.Sc2ySwM_344.1935 Sc2ySwM_344:8441312-8442428(-)	CpEXPA10	C.purpureus_R40 v1.1|CepurR40.4G018700.1	CM026424.1:1641000-1642250	CbEXP10	BFEA01000128.2	2359000-2361000	CcEXPA10	CM114260.1	20026000-20028000	MpEXPA10	Mp1g28890.1	SpmEXP10	s_56:516446-517971
AaEXPB4	AagrBONN_evm.model.Sc2ySwM_344.1937.1 EVM AagrBONN_evm.TU.Sc2ySwM_344.1937 Sc2ySwM_344:8446241-8447374(-)	CpEXPA11	C.purpureus_R40 v1.1|CepurR40.4G213400.1	CM026424.1:17732800-17733900	CbEXP11	BFEA01000164.1	2167700-2169400	CcEXPA11	CM114260.1	23018300-23020000	MpEXPA11	Mp2g18600.1	SpmEXP11	s_72:401220-402763
AaEXPB5	AagrBONN_evm.model.Sc2ySwM_344.1932.1 EVM AagrBONN_evm.TU.Sc2ySwM_344.1932 Sc2ySwM_344:8434949-8436087(-)	CpEXPA12	C.purpureus_R40 v1.1|CepurR40.4G140100.1	CM026424.111910750-11911550	CbEXP12	BFEA01000196.1	1227600-1229400	CcEXPA12	CM114260.1	23023200-23025000	MpEXPA12	Mp2g18610.1	SpmEXP12	s_72:403663-404814
AaEXPB6	AagrBONN_evm.model.Sc2ySwM_344.1938.1 EVM AagrBONN_evm.TU.Sc2ySwM_344.1938 Sc2ySwM_344:8448193-8449329(+)	CpEXPA13	C.purpureus_R40 v1.1|CepurR40.7G164700.1	CM026428.1:15228100-15228900	CbEXP13	BFEA01000196.2	1614100-1617800	CcEXPA13	CM114260.1	23034300-23036500	MpEXPA13	Mp3g03880.1
AaEXPB7	AagrBONN_evm.model.Sc2ySwM_344.1933.1 EVM AagrBONN_evm.TU.Sc2ySwM_344.1933 Sc2ySwM_344:8436863-8437851(+)	CpEXPA14	C.purpureus_R40 v1.1|CepurR40.8G158700.1	CM026429.1:13895400-13896900	CbEXP14	BFEA01000196.3	1931900-1936900	CcEXPA14	CM114260.1	23041500-23043700	MpEXPA14	Mp3g03890.1
AaEXPB8	AagrBONN_evm.model.Sc2ySwM_368.1134.1 EVM AagrBONN_evm.TU.Sc2ySwM_368.1134 Sc2ySwM_368:5020796-5021836(-)	CpEXPA15	C.purpureus_R40 v1.1|CepurR40.8G159300.1	CM026429.1:13929800-13931300	CbEXP15	BFEA01000224.1	1029400-1030200	CcEXPA15	CM114260.1	23049000-23051000	MpEXPA15	Mp3g03930.1
		CpEXPA16	C.purpureus_R40 v1.1|CepurR40.8G159400.1	CM026429.1:13939000-13940150	CbEXP16	BFEA01000676.3	204200-206000	CcEXPA16	CM114260.1	23056000-23058000	MpEXPA16	Mp3g03970.1
		CpEXPA17	C.purpureus_R40 v1.1|CepurR40.8G159500.1	CM026429.1:13964000-13966400	CbEXP17	BFEA01000676.2	232700-235000	CcEXPA17	CM114256.1	4593800-4596000	MpEXPA17	Mp3g06900.1
		CpEXPA18	C.purpureus_R40 v1.1|CepurR40.8G019200.1	CM026429.1:2624200-2625300	CbEXP18	BFEA01000676.1	317400-319600	CcEXPA18	CM114256.1	4599000-4602000	MpEXPA18	Mp3g08920.1
		CpEXPA19	C.purpureus_R40 v1.1|CepurR40.10G064600.1	CM026431.1:5795900-5796800	CbEXP19	BFEA01000756.1	188300-189500	CcEXPA19	CM114256.1	4627000-4629000	MpEXPA19	Mp3g09650.1
		CpEXPA20	C.purpureus_R40 v1.1|CepurR40.12G058700.1	CM026433.1:5114000-5115550	CbEXP20	BFEA01000771.1	267300-270500	CcEXPA20	CM114256.1	4653500-4656000	MpEXPA20	Mp3g09750.1
		CpEXPA21	C.purpureus_R40 v1.1|CepurR40.12G095000.1	CM026433.1:8240000-8241050	CbEXP21	BFEA01000771.2	553700-558000	CcEXPA21	CM114256.1	15019000-15021500	MpEXPA21	Mp3g09760.1
		CpEXPA22	----	MU104907.1:30700-31600	CbEXP22	BFEA01000831.1	193300-194000	CcEXPA22	CM114256.1	20102500-20105500	MpEXPA22	Mp3g09770.1
		CpEXPB1	C.purpureus_R40 v1.1|CepurR40.N028200.1	MU104877.1:29944-31288				CcEXPA23	CM114259.1	26914500-26916900	MpEXPA23	Mp3g10120.1
		CpEXPB2	C.purpureus_R40 v1.1|CepurR40.2G156000.1	CM026422.1:14140579-14142029				CcEXPA24	CM114259.1	26920000-26922600	MpEXPA24	Mp3g10130.1
		CpEXPB3	C.purpureus_R40 v1.1|CepurR40.2G156100.1	CM026422.1:14146782-14148407				CcEXPA25	CM114259.1	26934500-26937200	MpEXPA25	Mp3g10160.1
		CpEXPB4	C.purpureus_R40 v1.1|CepurR40.11G144300.1	CM026432.1:13075083-13076393				CcEXPA26	CM114259.1	26941000-26943800	MpEXPA26	Mp3g12280.1
		CpEXPB5	C.purpureus_R40 v1.1|CepurR40.11G080800.1	CM026432.1:7304874-7306821				CcEXPA27	CM114257.1	8419000-8422000	MpEXPA27	Mp3g12290.1
		CpEXPB6	C.purpureus_R40 v1.1|CepurR40.11G125900.1	CM026432.1:10792345				CcEXPA28	CM114257.1	8423000-8425500	MpEXPA28	Mp3g12300.1
								CcEXPA29	CM114258.1	982000-985500	MpEXPA29	Mp3g22690.1
								CcEXPA30	CM114258.1	994000-997000	MpEXPA30	Mp3g24450.1
								CcEXPA31	CM114258.1	1010000-1014000	MpEXPA31	Mp3g24470.1
								CcEXPA32	CM114258.1	15249300-15252000	MpEXPA32	Mp4g06560.1
											MpEXPA33	Mp4g22170.1
											MpEXPA34	Mp4g22180.1
											MpEXPA35	Mp5g01930.1
											MpEXPA36	Mp5g20420.1
											MpEXPA37	Mp5g20430.1
											MpEXPA38	Mp8g18860.1
